# Supplementary material
Source: PubMed Central journal article supplement (PMC3799065)
Supplement: npp2013147x1.pdf [file npp2013147x1.pdf]

**CRF-CRF<sub>1</sub> receptor system in the Central and Basolateral nuclei of the Amygdala  
differentially mediates excessive eating of palatable food**

Attilio Iemolo, Ph.D.<sup>1</sup>; Angelo Blasio, Ph.D.<sup>1</sup>; Stephen A. St. Cyr, M.A.<sup>1</sup>; Fanny Jiang<sup>1</sup>; Kenner  
C. Rice, Ph.D.<sup>2</sup>; Valentina Sabino, Ph.D.<sup>1</sup>; Pietro Cottone, Ph.D.<sup>1</sup>

<sup>1</sup>Laboratory of Addictive Disorders, Departments of Pharmacology and Psychiatry, Boston  
University School of Medicine, Boston, MA 02118; <sup>2</sup>Chemical Biology Research Branch,  
National Institute on Drug Abuse and the National Institute on Alcohol Abuse and Alcoholism,  
Rockville, MD

Correspondence and requests for materials should be addressed to:

Pietro Cottone (Email: [cottone@bu.edu](mailto:cottone@bu.edu))

Laboratory of Addictive Disorders, Departments of Pharmacology and Psychiatry

Boston University School of Medicine

72 E Concord St, R-618

Boston, MA 02118 USA

Phone: 617-638-5662 / Fax: 617-638-5668

## Supplementary Tables and Figures

**Supplementary Table 1. Number of subjects used in this study**

| <i>Pharmacological experiments</i> |         |         | <i>Chow/Chow</i> |             |             | <i>Chow/Palatable</i> |             |             |
|------------------------------------|---------|---------|------------------|-------------|-------------|-----------------------|-------------|-------------|
|                                    |         |         | 0 µg/side        | 0.5 µg/side | 1.5 µg/side | 0 µg/side             | 0.5 µg/side | 1.5 µg/side |
| CeA                                | Food    | P Phase | 11*              | 11*         | 11*         | 8*                    | 8*          | 8*          |
|                                    |         | C Phase | 11*              | 11*         | 11*         | 7*                    | 7*          | 7*          |
|                                    | Anxiety |         | 8                |             | 8           | 6                     |             | 6           |
| BIA                                | Food    | P Phase | 10*              | 10*         | 10*         | 14*                   | 14*         | 14*         |
|                                    |         | C Phase | 11*              | 11*         | 11*         | 14*                   | 14*         | 14*         |
|                                    | Anxiety |         | 14               |             | 15          | 7                     |             | 7           |
| BNST                               | Food    | P Phase | 11*              | 11*         | 11*         | 10*                   | 10*         | 10*         |
|                                    |         | C Phase | 8*               | 8*          | 8*          | 11*                   | 11*         | 11*         |
|                                    | Anxiety |         | 10               |             | 8           | 10                    |             | 9           |
| <i>Immunohistochemistry</i>        |         |         | <i>Chow/Chow</i> |             |             | <i>Chow/Palatable</i> |             |             |
| CeA                                |         |         | 7                |             |             | C Phase               | P Phase     |             |
|                                    |         |         |                  |             |             | 8                     | 7           |             |
| BIA                                |         |         | 6                |             |             | C Phase               | P Phase     |             |
|                                    |         |         |                  |             |             | 7                     | 6           |             |
| BNST                               |         |         | 7                |             |             | C Phase               | P Phase     |             |
|                                    |         |         |                  |             |             | 8                     | 7           |             |

\* indicates within-subject experiment

Supplementary Figure 1

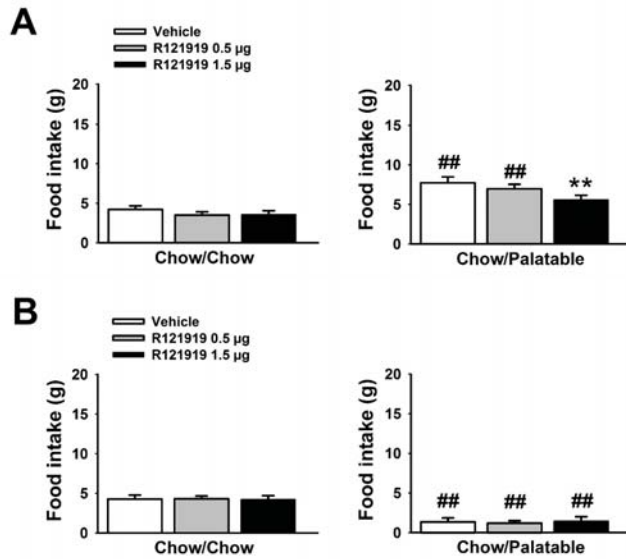

Effects of microinfusion of the selective CRF<sub>1</sub> receptor antagonist R121919 (0, 0.5, 1.5 µg/side) in the central nucleus of the amygdala (CeA) on excessive eating of palatable food, and hypophagia of regular chow diet ( $n=37$ ). Rats were tested after 7 weeks of diet cycling. **(A)** Intra-CeA R121919 fully blocked the excessive eating of palatable food in *Chow/Palatable* rats (*right panel*), without affecting regular chow intake in control *Chow/Chow* rats (*left panel*); **(B)** Intra-CeA R121919 did not affect the intake of the regular chow diet in either *Chow/Chow* the (*left panel*) or *Chow/Palatable* (*right panel*) group; Panel represents  $M \pm SEM$ . Symbols denote: \* significant difference from vehicle condition  $p < 0.05$ , \*\*  $p < 0.01$ ; ## significant difference from *Chow/Chow* vehicle  $p < 0.01$ .

## Supplementary Figure 2

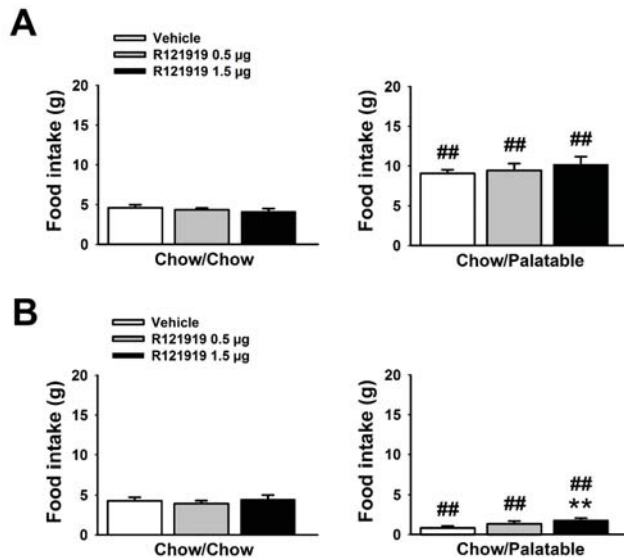

Effects of microinfusion of the selective CRF<sub>1</sub> receptor antagonist R121919 (0, 0.5, 1.5 µg/side) in the basolateral nucleus of the amygdala (BIA) on excessive eating of palatable food and hypophagia of regular chow diet ( $n=49$ ). Rats were tested after 7 weeks of diet cycling. **(A)** Intra-BIA R121919 did not affect the intake of the regular chow diet in *Chow/Chow* (*left panel*) or the excessive eating of palatable food in *Chow/Palatable* (*right panel*); **(B)** Intra-BIA R121919 reduced the hypophagia of regular chow diet in *Chow/Palatable* rats (*right panel*), without affecting it in *Chow/Chow* rats (*left panel*); Panel represents  $M \pm SEM$ . Symbols denote: \*\* significant difference from vehicle condition  $p < 0.01$ , ## significant difference from *Chow/Chow* vehicle  $p < 0.01$ .

## Supplementary Figure 3

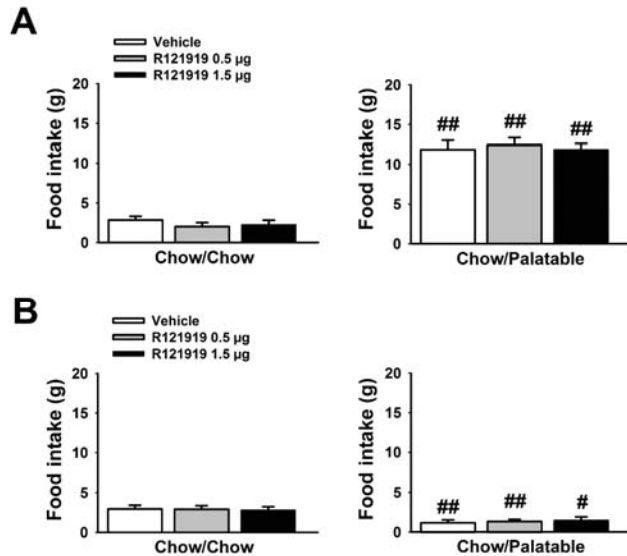

Effects of microinfusion of the selective CRF<sub>1</sub> receptor antagonist R121919 (0, 0.5, 1.5 µg/side) in the bed nucleus of the stria terminalis (BNST) on excessive eating of palatable food, hypophagia of regular chow diet, and anxiety-like behavior in male Wistar rats ( $n=40$ ). Rats were tested after 7 weeks of diet cycling. **(A)** Intra-BNST R121919 did not affect the intake of the regular chow diet in *Chow/Chow* (left panel) or excessive eating of palatable food in *Chow/Palatable* (right panel); **(B)** Intra-BNST R121919 did not affect the intake of the regular chow diet in either the *Chow/Chow* (left panel) or *Chow/Palatable* (right panel) group. Panel represents  $M \pm SEM$ . Symbols denote: # significant difference from *Chow/Chow* vehicle  $p < 0.05$ , ##  $p < 0.01$ .
